# Supplementary material
Source: ML conference proceedings conference paper supplement (https://openaccess.thecvf.com/content/ICCV2023/html/Mercier_Efficient_Neural_Supersampling_ICCV_2023_paper.html)
Supplement: Supplementary file 1 [file Mercier_Efficient_Neural_Supersampling_ICCV_2023_supplemental.pdf]

## Annex A. The Qualcomm Rasterized Images for Super-resolution Processing dataset

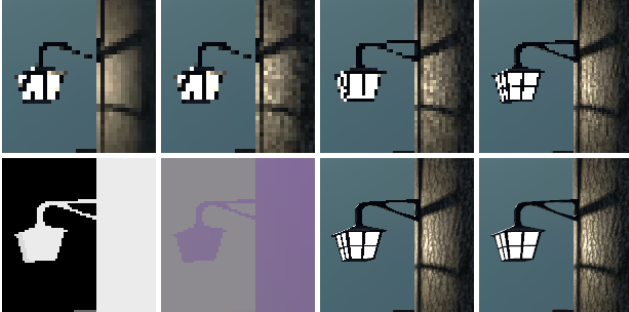

Figure 11. Example of data modalities available in the QRISP dataset. (first row, from left to right): Native 270p, Negative 2 mipmap biased 270p, Negative 1.58 mipmap biased 360p, Negative 1 mipmap biased 540p. (second row, from left to right): 540p depth, 540p motion vectors, Native 1080p, Enhanced 1080p

### A.1. Motivation

The Qualcomm Rasterized Images for Super-resolution Processing dataset was created to facilitate the development and research of super-resolution algorithms for gaming. The dataset consists of parallel captures of various scenes in different modalities and resolutions. It is designed to be diverse, with a variety of backgrounds and models, to better generalize to new video games. The dataset can be found at <https://developer.qualcomm.com/software/ai-datasets/qualcomm-rasterized-images>.

### A.2. Dataset modalities

The dataset consists of sequences of consecutive frames captured at 60 frames per second. For each frame, multiple modalities are rendered at different resolutions ranging from 270p to 1080p. Table 4 provides a list of these modalities, which can be either generated using default parameters or mipmap biased, jittered, or both mipmap biased and jittered. In addition to the modalities listed in the table, a JSON file containing camera parameters (including jitter offsets) is included for each segment. The following provides details about each type of modality:

**Color** Rendered images are stored in 8-bit RGBA PNG files. In addition to low-resolution and native renders at 1080p resolution, we generate an additional color modality referred to as “Enhanced”. This was produced by rendering color images at 2160p with MSAAx8 applied followed by 2x downsizing, resulting in a high-quality 1080p target image.

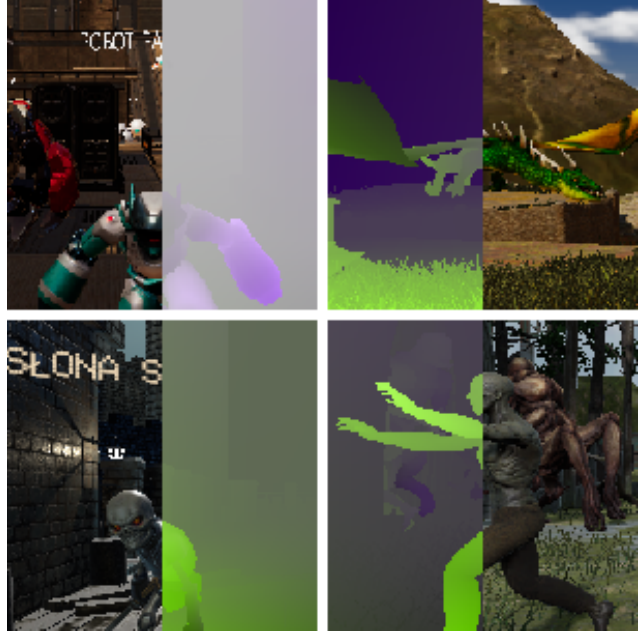

Figure 12. Example of animated characters and textual UI elements added manually to each scene. For each crop, we show both color and motion information to illustrate that these objects are moving and that the added UI does not have associated motion (nor depth) information.

**Motion** Motion vectors are stored in a 16-bit EXR file, with the vertical velocity stored in the first channel and the horizontal velocity stored in the second. Unity uses a Y-up coordinate system so the vertical velocities may need to be negated to match the coordinate system used during motion compensation. Values are stored in the  $[-1, 1]$  range, so they need to be scaled by the number of pixels in the corresponding dimension to convert the velocity in pixel units.

**Depth** We save the depth information from the 32-bit z-buffer in the four channels of an 8-bit PNG file. The depth value corresponds to the distance between the rendered pixel and the camera near plane, scaled to the  $[0, 1]$  range, where 0 represents the near plane and 1 the far plane. To convert back from  $[0, 255]^4$  to  $[0, 1]$ , we used the following equation:

$$depth = R/255 + G/255^2 + B/255^3 + A/255^4 \quad (4)$$

Where R, G, B, and A are the four 8-bit channels from the PNG file.

**Jittering and other camera-related information** For each segment, we provide a JSON file with camera intrinsic parameters (near plane, far plane and FOV) and frame-level information (jitter offset, camera position and orientation).

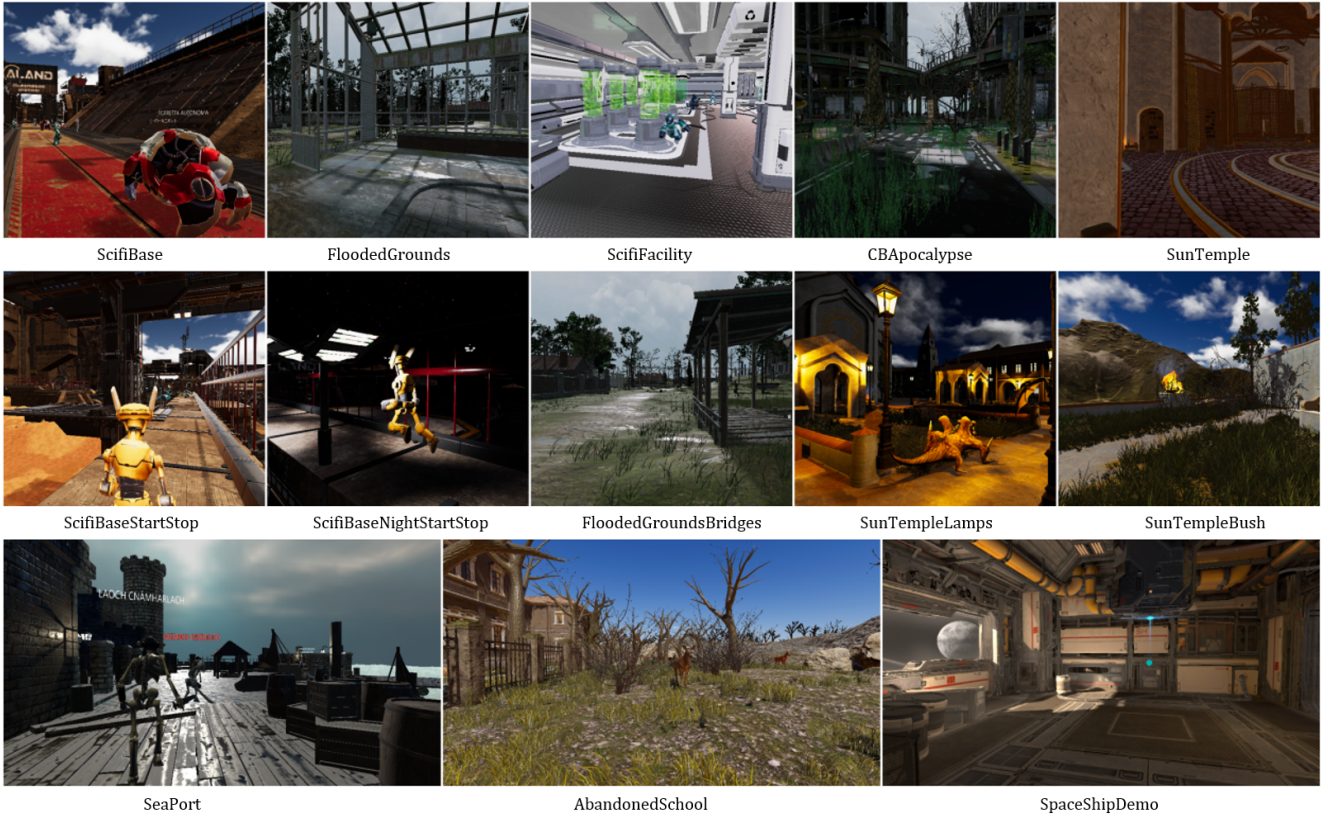

Figure 13. Overview of the 13 scenes from the QRISP dataset. The first two rows correspond to the 10 training scenes. The last rows shows the 3 scenes used for evaluation.

### A.3. Dataset composition and collection process

The dataset consists of renders from 13 scenes in total, with 10 of them allocated for training and the remaining 3 reserved for evaluation. Table 5 provides a list of the scenes and the number of segments and frames available for each.

**Scenes compositions** Our dataset includes 3D assets sourced either from the Unity Asset Store (link), or from open-source GitHub projects. To make the data more representative of real-world gaming scenarios, we manually add animated characters to the scene. We also occasionally add textual UI elements on top of animated characters to make the algorithms more robust to elements without associated depth or motion vector information. A list of the assets used is provided in Table 6.

**Capture process** In Unity, we use multiple “twin” cameras and shaders which all follow the same path to capture multiple resolutions and modalities simultaneously within the same frame. To ensure synchronization of pixels between the different renders, we may need to adjust certain parameters on a per-scene basis to make sure the rendering

and animation is framerate dependent, like removing any asynchronous effects (e.g. wind physics for grass). We obtain jittered modalities by shifting the corresponding camera by a sub-pixel offset drawn from a cyclic Halton(2, 3) sequence of length 16 and sometimes include “stops” in the camera path where the camera remains stationary.

**Preprocessing/cleaning/labeling** Frame-blurring post processing (bloom, motion blur, etc.) and anti-aliasing was disabled for all modalities, except for the “Enhanced” modality where we used MSAA as described earlier.

**Camera path and recording** Sections of camera path were pre-recorded using the Unity game engine running at 60 fps (frames per second). During capturing, the camera followed the pre-recorded path through the scene and frames were captured at regular intervals of 30 frames for training data and 300 frames for evaluation data. In the case of training scenes including camera stops (see Table 5), the camera usually stayed stationary for 10 frames. Most training scenes have 120 frames between each segment of frames to increase diversity.

#### **A.4. Commercial baselines**

In this dataset, we have also included images generated by commercial solutions integrated into Unity on the same frames used for evaluation. At the time of the dataset collection, these included Nvidia's DLSS 2.2.11.0 and AMD's FSR 1.2, which can serve as reference baselines to assess the performance of new algorithms.

#### **A.5. Potential use beyond super-resolution**

While this dataset was primarily created to facilitate the development of super-resolution algorithms for gaming applications; however, we believe that it could be useful for other tasks, such as optical flow estimation.

| Resolution | Name                                  | Jittering applied? | Mipmap bias offset | Modality type |
|------------|---------------------------------------|--------------------|--------------------|---------------|
| 1080p      | Native                                | No                 | 0                  | Color         |
|            | Enhanced                              | No                 | NA                 | Color         |
| 540p       | DepthMipBiasMinus1                    | No                 | -1                 | Depth         |
|            | DepthMipBiasMinus1Jittered            | Yes                | -1                 | Depth         |
|            | MipBiasMinus1                         | No                 | -1                 | Color         |
|            | MipBiasMinus1Jittered                 | Yes                | -1                 | Color         |
|            | MotionVectorsMipBiasMinus1            | No                 | -1                 | Motion vector |
|            | MotionVectorsMipBiasMinus1Jittered    | Yes                | -1                 | Motion vector |
|            | Native                                | No                 | 0                  | Color         |
| 360p       | DepthMipBiasMinus1.58                 | No                 | -1,58              | Depth         |
|            | DepthMipBiasMinus1.58Jittered         | Yes                | -1,58              | Depth         |
|            | MipBiasMinus1.58                      | No                 | -1,58              | Color         |
|            | MipBiasMinus1.58Jittered              | Yes                | -1,58              | Color         |
|            | MotionVectorsMipBiasMinus1.58         | No                 | -1,58              | Motion vector |
|            | MotionVectorsMipBiasMinus1.58Jittered | Yes                | -1,58              | Motion vector |
|            | Native                                | No                 | 0                  | Color         |
| 270p       | DepthMipBiasMinus2                    | No                 | -2                 | Depth         |
|            | DepthMipBiasMinus2Jittered            | Yes                | -2                 | Depth         |
|            | MipBiasMinus2                         | No                 | -2                 | Color         |
|            | MipBiasMinus2Jittered                 | Yes                | -2                 | Color         |
|            | MotionVectorsMipBiasMinus2            | No                 | -2                 | Motion vector |
|            | MotionVectorsMipBiasMinus2Jittered    | Yes                | -2                 | Motion vector |
|            | Native                                | No                 | 0                  | Color         |

Table 4. Per-resolution breakdown of the modalities available in the QRISP dataset. Each modality can be either generated using default parameters, mipmap biased, jittered, or both mipmap biased and jittered.

| Scene                   | Split | Segments | Frames Per Segment | Total Frames | Includes stops? |
|-------------------------|-------|----------|--------------------|--------------|-----------------|
| FloodedGrounds          | Train | 21       | 30                 | 630          | No              |
| SciFifacility           | Train | 21       | 30                 | 630          | No              |
| SunTemple               | Train | 36       | 30                 | 1080         | No              |
| CB-Apocalypse           | Train | 30       | 30                 | 900          | No              |
| SciFiBase               | Train | 41       | 30                 | 1230         | No              |
| FloodedGroundsBridges   | Train | 20       | 30                 | 600          | Yes             |
| ScifiBaseNightStartStop | Train | 20       | 30                 | 600          | Yes             |
| ScifiBaseStartStop      | Train | 21       | 30                 | 630          | Yes             |
| SunTempleBush           | Train | 11       | 30                 | 330          | Yes             |
| SunTempleLamps          | Train | 21       | 30                 | 630          | Yes             |
| AbandonedSchool         | Test  | 2        | 300                | 600          | Yes             |
| SpaceShipDemo           | Test  | 2        | 300                | 600          | Yes             |
| Seaport                 | Test  | 1        | 300                | 300          | Yes             |
| Total Training          | -     | 242      | 30                 | 7260         | -               |
| Total Test              | -     | 5        | 300                | 1500         | -               |
| Total                   | -     | -        | -                  | 8760         | -               |

Table 5. List of dataset scenes, with split information, the number of segments and frames per segment, and whether it includes static segments where the camera remains stationary.

| Scene                                                      | Assets Used                     | Source                                                                                                                |
|------------------------------------------------------------|---------------------------------|-----------------------------------------------------------------------------------------------------------------------|
| CB-Apocalypse                                              | CBU: Apocalypse Edition         | Unity Asset Store                                                                                                     |
|                                                            | ULTIMATE ANIMATION COLLECTION   | Unity Asset Store                                                                                                     |
|                                                            | Animal Pack Deluxe              | Unity Asset Store                                                                                                     |
|                                                            | Customizable Survivors Pack     | Unity Asset Store                                                                                                     |
| SciFiFacility                                              | Sci-Fi Facility                 | Unity Asset Store                                                                                                     |
|                                                            | Robot Warriors Cartoon          | Unity Asset Store                                                                                                     |
| FloodedGrounds<br>FloodedGroundsBridges                    | Flooded Grounds                 | Unity Asset Store                                                                                                     |
|                                                            | Ghoul-zombie                    | Unity Asset Store                                                                                                     |
|                                                            | Zombie                          | Unity Asset Store                                                                                                     |
|                                                            | Fantastic Creature #1           | Unity Asset Store                                                                                                     |
| SciFiBase<br>SciFiBaseNightStartStop<br>SciFiBaseStartStop | Sci-Fi base                     | Unity Asset Store                                                                                                     |
|                                                            | Robot 1                         | Unity Asset Store                                                                                                     |
|                                                            | Robot Warriors Cartoon          | Unity Asset Store                                                                                                     |
|                                                            | Robot Sphere                    | Unity Asset Store                                                                                                     |
| SunTemple                                                  | Sun Temple                      | Unity Asset Store                                                                                                     |
|                                                            | Animal Pack Deluxe              | Unity Asset Store                                                                                                     |
|                                                            | Dragon for Boss Monster : HP    | Unity Asset Store                                                                                                     |
| SunTempleBush                                              | Sun Temple                      | Unity Asset Store                                                                                                     |
|                                                            | Real Landscapes - Valley Forest | Unity Asset Store                                                                                                     |
| SunTempleLamps                                             | Sun Temple                      | Unity Asset Store                                                                                                     |
|                                                            | Dragon for Boss Monster : HP    | Unity Asset Store                                                                                                     |
|                                                            | Flooded Grounds                 | Unity Asset Store                                                                                                     |
| AbandonedSchool                                            | Animal Pack Deluxe              | Unity Asset Store                                                                                                     |
|                                                            | HQ Abandoned School (Modular)   | Unity Asset Store                                                                                                     |
| SpaceShipDemo                                              | Space Ship Demo                 | <a href="https://github.com/Unity-Technologies/SpaceshipDemo">https://github.com/Unity-Technologies/SpaceshipDemo</a> |
| Seaport                                                    | Old Sea Port                    | Unity Asset Store                                                                                                     |
|                                                            | Fantasy Monster - Skeleton      | Unity Asset Store                                                                                                     |
|                                                            | Dungeon Skeletons Demo          | Unity Asset Store                                                                                                     |

Table 6. List of assets used for each scene.

## Annex B. Supplementary results

| Upscaling       | Model              | AbandonedSchool |               |              | SeaPort       |               |              | SpaceShipDemo |               |              | Average       |               |              |
|-----------------|--------------------|-----------------|---------------|--------------|---------------|---------------|--------------|---------------|---------------|--------------|---------------|---------------|--------------|
|                 |                    | PSNR            | SSIM          | LPIPS        | PSNR          | SSIM          | LPIPS        | PSNR          | SSIM          | LPIPS        | PSNR          | SSIM          | LPIPS        |
| 2×              | Bicubic            | 28.69           | 0.8257        | 0.218        | 26.18         | 0.8623        | 0.239        | 33.66         | 0.9137        | 0.200        | 29.51         | 0.8672        | 0.219        |
|                 | DLSS 2.2           | 29.78           | 0.8428        | 0.173        | 27.41         | 0.8880        | 0.203        | 33.43         | 0.9140        | 0.185        | 30.21         | 0.8816        | 0.187        |
|                 | Xiao <i>et al.</i> | 30.84           | 0.8632        | 0.145        | 28.43         | 0.9079        | 0.165        | 36.39         | 0.9516        | 0.110        | 31.89         | 0.9075        | 0.140        |
|                 | Ours-S (f16-m1)    | 30.15           | 0.8477        | 0.156        | 28.08         | 0.8971        | 0.183        | 35.30         | 0.9374        | 0.140        | 31.18         | 0.8941        | 0.160        |
|                 | Ours-M (f32-m3)    | 30.66           | 0.8564        | 0.136        | 28.62         | 0.9086        | 0.169        | 36.11         | 0.9482        | 0.116        | 31.80         | 0.9044        | 0.140        |
| Ours-L (f64-m5) | <b>31.03</b>       | <b>0.8650</b>   | <b>0.134</b>  | <b>29.00</b> | <b>0.9154</b> | <b>0.161</b>  | <b>36.60</b> | <b>0.9541</b> | <b>0.107</b>  | <b>32.21</b> | <b>0.9115</b> | <b>0.134</b>  |              |
| 3×              | Bicubic            | 26.77           | 0.7434        | 0.304        | 24.61         | 0.8039        | 0.356        | 31.46         | 0.8628        | 0.306        | 27.61         | 0.8034        | 0.322        |
|                 | Xiao <i>et al.</i> | 29.11           | 0.8039        | 0.197        | 27.01         | 0.8864        | 0.239        | 34.61         | 0.9284        | 0.163        | 30.24         | 0.8729        | 0.200        |
|                 | Ours-M (f32-m3)    | 29.04           | 0.7983        | 0.188        | 27.24         | 0.8749        | 0.243        | 34.41         | 0.9234        | 0.178        | 30.23         | 0.8655        | 0.203        |
|                 | Ours-L (f64-m5)    | <b>29.32</b>    | <b>0.8043</b> | <b>0.175</b> | <b>27.68</b>  | <b>0.8857</b> | <b>0.232</b> | <b>35.02</b>  | <b>0.9341</b> | <b>0.153</b> | <b>30.67</b>  | <b>0.8747</b> | <b>0.187</b> |
| 4×              | Bicubic            | 25.61           | 0.6834        | 0.365        | 23.59         | 0.7577        | 0.432        | 30.06         | 0.8194        | 0.376        | 26.42         | 0.7535        | 0.391        |
|                 | Xiao <i>et al.</i> | 27.94           | 0.7550        | 0.248        | 25.91         | 0.8510        | 0.306        | 33.22         | 0.9031        | 0.222        | 29.02         | 0.8364        | 0.259        |
|                 | Ours-M (f32-m3)    | 27.91           | 0.7495        | 0.234        | 26.19         | 0.8443        | 0.306        | 33.08         | 0.8976        | 0.234        | 29.06         | 0.8305        | 0.258        |
|                 | Ours-L (f64-m5)    | <b>28.16</b>    | <b>0.7566</b> | <b>0.214</b> | <b>26.55</b>  | <b>0.8554</b> | <b>0.291</b> | <b>33.54</b>  | <b>0.9090</b> | <b>0.209</b> | <b>29.42</b>  | <b>0.8403</b> | <b>0.238</b> |

Table 7. Per-scene breakdown of PSNR, SSIM and LPIPS scores for our model, compared to DLSS 2.2 and our implementation of Xiao *et al.* [59] for 2×, 3× and 4× upscaling.
